# Supplementary material for: Cyclodextrin-induced release of drug-entrapping liposomes associated with the solation of liposome gels
Source: Royal Society of Chemistry journal article supplement (doi:10.1039/d2ra03837d), 2022-01-01
Supplement: d2ra03837d1.pdf [file d2ra03837d1.pdf]

## Electronic Supplementary Information

### **Cyclodextrin-induced release of drug-entrapping liposomes associated with the solation of liposome gels**

Hiromu Yamada,<sup>a</sup> Keita Yamana,<sup>a</sup> Riku Kawasaki,<sup>a</sup> Kazuma Yasuhara<sup>b</sup> and Atsushi Ikeda <sup>\*a</sup>

<sup>a</sup>Applied Chemistry Program, Graduate School of Advanced Science and Engineering, Hiroshima University, 1-4-1 Kagamiyama, Higashi-Hiroshima 739-8527, Japan.

<sup>b</sup>Division of Materials Science, Graduate School of Science and Technology and Center for Digital Green-innovation, Nara Institute of Science and Technology, 8916-5 Takayama-cho, Ikoma, Nara 630-0192, Japan.

**Table S1.** Hydrodynamic diameters ( $D_{hy}$ ) of sols<sup>a</sup> after the addition of  $\alpha$ -CDx determined by dynamic light scattering at 50 °C.

| CDx           | 1/% (w/v) | [CDx] | [DPPC] | $D_{hy}/nm$    | PDI <sup>b</sup> |
|---------------|-----------|-------|--------|----------------|------------------|
| $\alpha$ -CDx | 0         | 7.5   | 2.5    | 93.6 $\pm$ 2.2 | 0.09             |
| $\alpha$ -CDx | 0         | 75    | 2.5    | 1038 $\pm$ 357 | 0.80             |

<sup>a</sup>Sol solutions were diluted to 1/10 using water. The final concentrations of CDx and DPPC were 0.75 and 0.25 mM, respectively. <sup>b</sup>PDI: Polydispersity index.

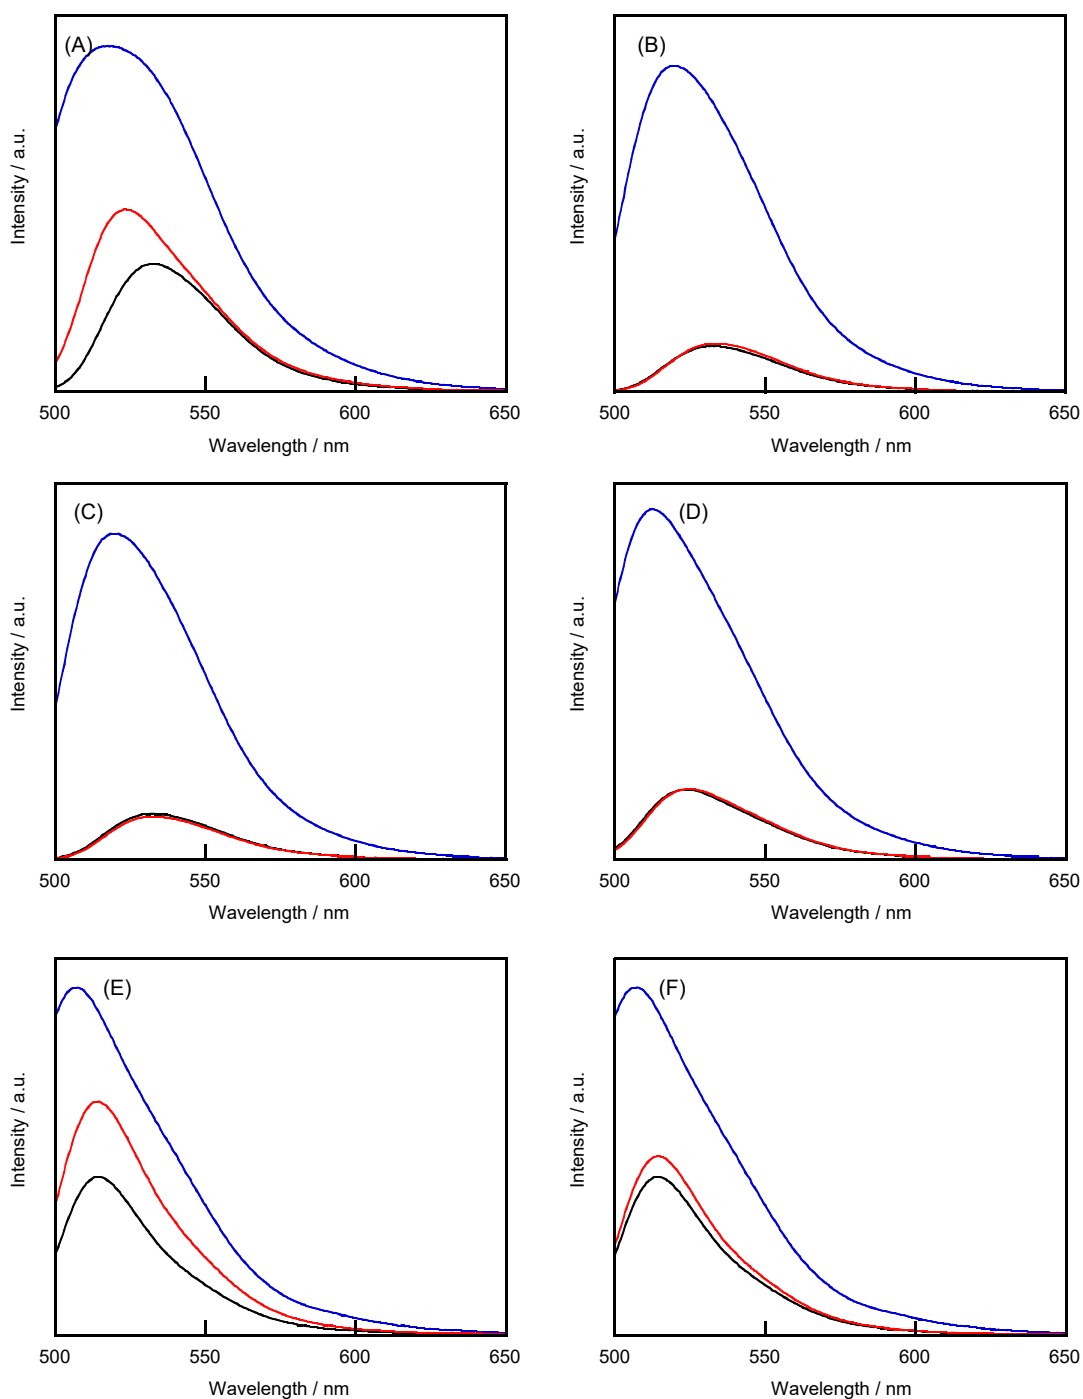

**Fig. S1** Fluorescence spectra of the DPPC liposome encapsulating calcein without **1** (50  $\mu$ L) after the addition of water (50  $\mu$ L) (black) or a 15 mM aqueous solution (50  $\mu$ L) (red) of (A)  $\beta$ -CDx, (B) DMe- $\beta$ -CDx, (C) TMe- $\beta$ -CDx, and (D)  $\gamma$ -CDx and a 50 mM aqueous solution (50  $\mu$ L) of (E) DMe- $\beta$ -CDx and (F)  $\gamma$ -CDx, and after the addition of 222 mM Triton X-100 (10  $\mu$ L) (blue). The final concentrations of the mixtures (1.2 mL) were [DPPC] = 2.5 mM and [CDx] = 0, 7.5, or 75 mM. Because the solutions of (D), (E), and (F) were cloudy after the addition of Triton X-100 in the case of (D) and (F) or after the addition of DMe- $\beta$ -CDx in the case of (E), all solutions of (D), (E), and (F) were diluted to 1/2, 1/10, and 1/10, respectively, using water.

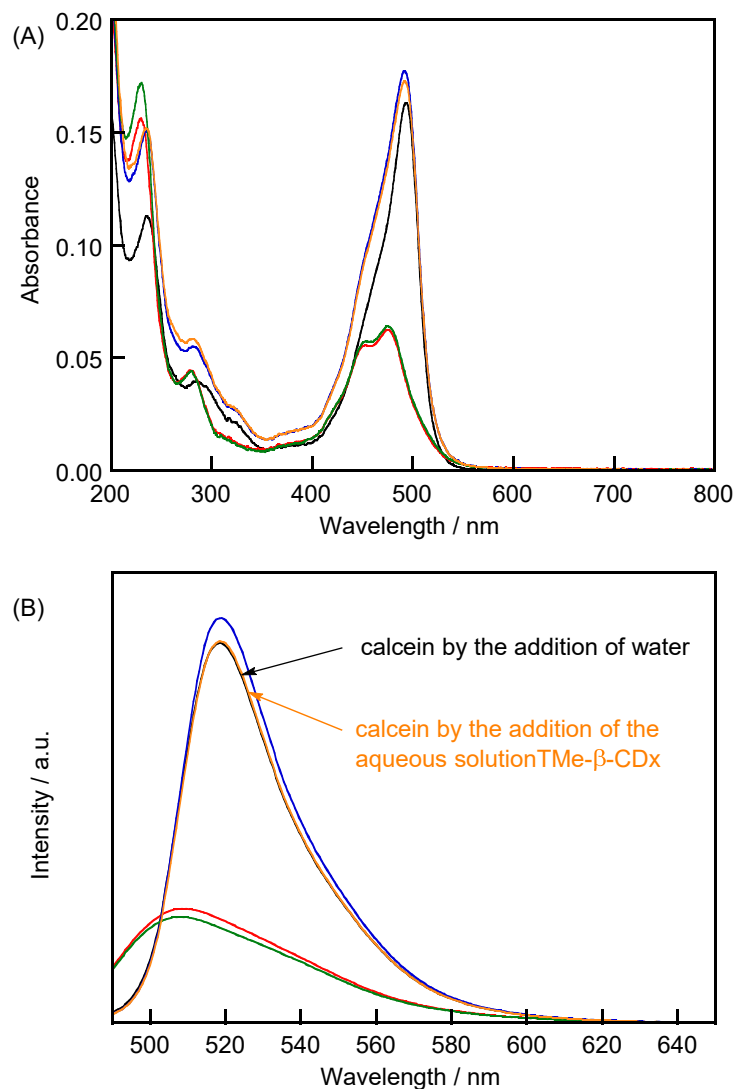

**Fig. S2** (A) UV-Vis absorption and (B) fluorescence (excitation wavelength of 475 nm) spectra of the aqueous solutions of calcein by the addition of water (black) and the aqueous solutions of  $\beta$ -CDx (red), DMe- $\beta$ -CDx (blue), TMe- $\beta$ -CDx (orange), and  $\gamma$ -CDx (green) using 1-mm and 1-cm cells for UV-Vis absorption and fluorescence spectra, respectively, 20°C, [calcein] = 0.038 mM, [CDx] = 0.75 mM).

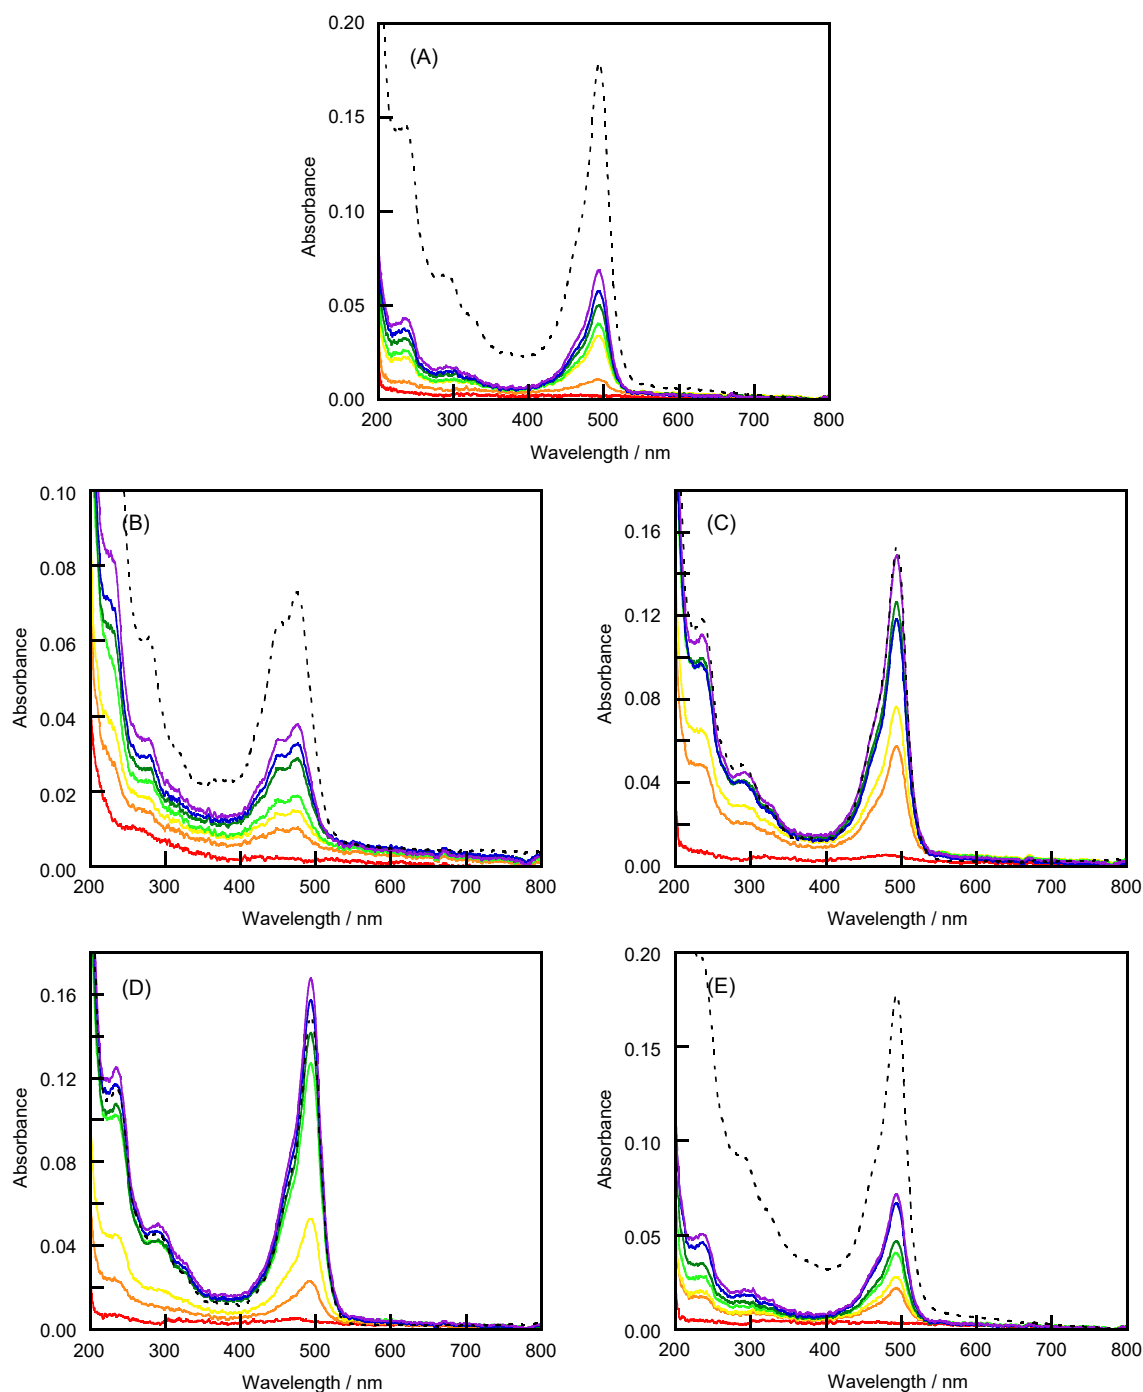

**Fig. S3** UV-Vis absorption spectra of calcein in the bulk solution after the addition of (A) water, and the aqueous solutions of (B)  $\beta$ -CDx, (C) DMe- $\beta$ -CDx, (D) TMe- $\beta$ -CDx, and (E)  $\gamma$ -CDx kept at ambient temperature with incubation times of 0 (red), 10 (orange), 20 (yellow), 30 (light green), 40 (green), 50 (blue), and 60 (purple) min using a cell path length of 1 mm. The black dotted lines show calcein (5 mM) in the absence of (A) CDx and in the presence of (B)  $\beta$ -CDx, (C) DMe- $\beta$ -CDx, (D) TMe- $\beta$ -CDx, and (E)  $\gamma$ -CDx. The final concentrations of the mixtures (1.2 mL) were [DPPC] = 2.5 mM, 1: 1.5% (w/v), and [CDx] = 0 or 7.5 mM.

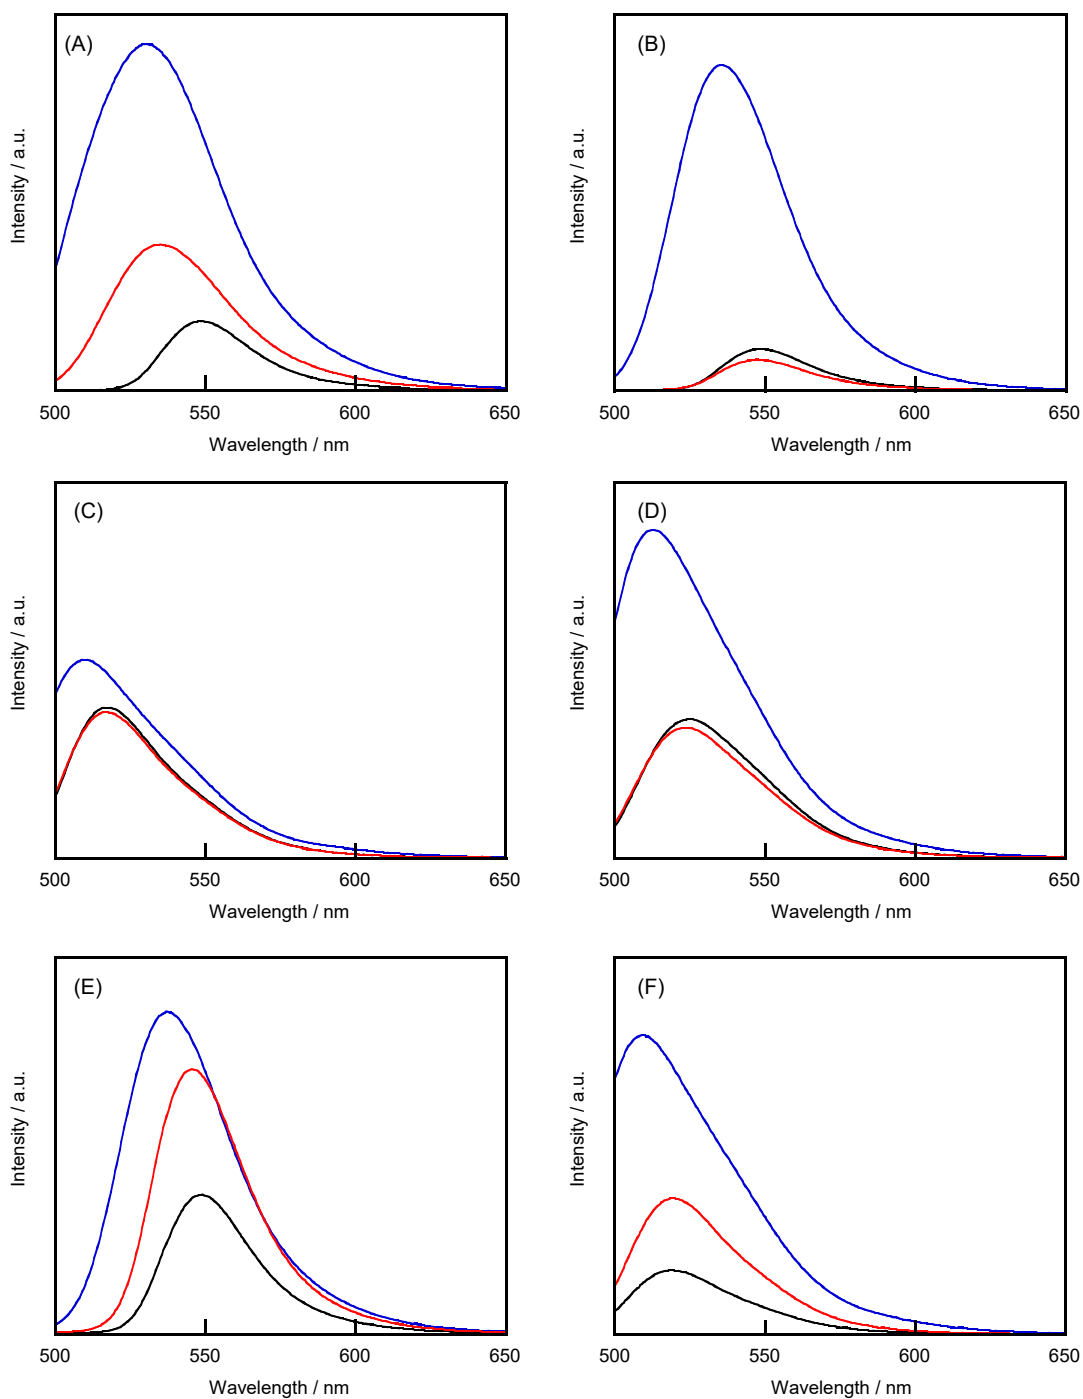

**Fig. S4** Fluorescence spectra of the DPPC liposome encapsulating calcein with **1** (600  $\mu$ L) after the addition of water (600  $\mu$ L) (black) or a 15 mM aqueous solution (600  $\mu$ L) (red) of (A)  $\beta$ -CDx, (B) DMe- $\beta$ -CDx, (C) TMe- $\beta$ -CDx, and (D)  $\gamma$ -CDx and a 150 mM aqueous solution (600  $\mu$ L) of (E) DMe- $\beta$ -CDx and (F)  $\gamma$ -CDx, and after the addition of 222 mM Triton X-100 (120  $\mu$ L) (blue). The final concentrations of the mixtures (1.2 mL) were [DPPC] = 2.5 mM and [CDx] = 0, 7.5, or 75 mM. Because the interaction between calcein and TMe- $\beta$ -CDx decreased the fluorescence intensity, all solutions in (C) were diluted to 1/2 using water. Furthermore, because the solutions in (F) were cloudy after the addition of Triton X-100, all solutions in (F) were diluted to 1/10 using water.

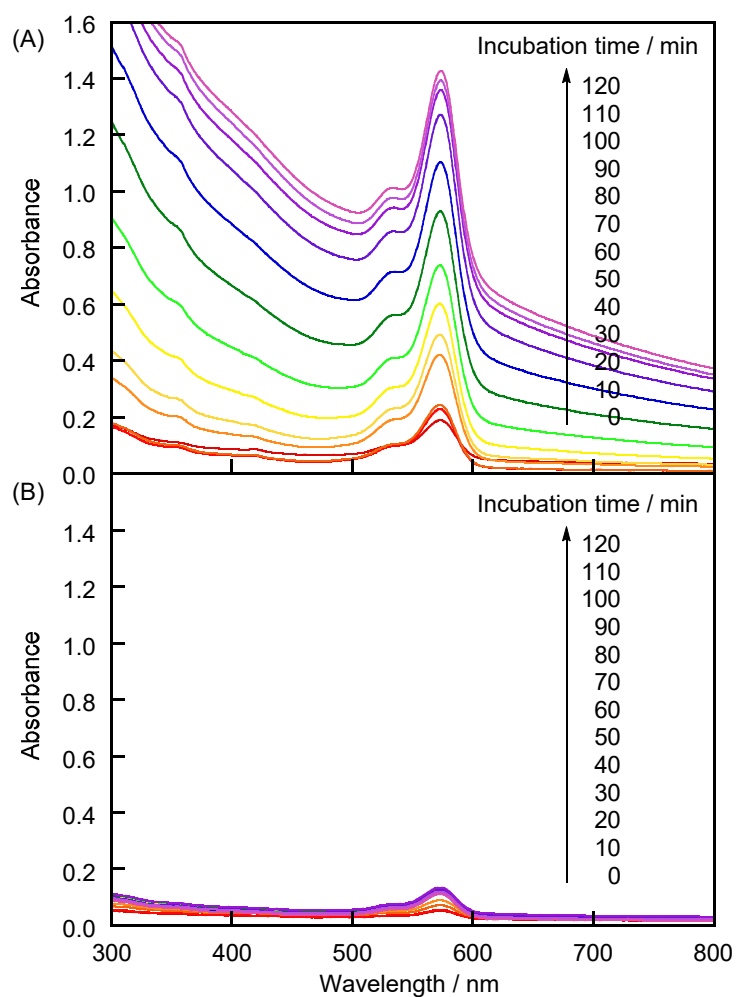

**Fig. S5** UV-Vis absorption spectra of (A) an aqueous solution of TMe- $\beta$ -CDx and (B) saline in the presence of liposome gels containing **3** at the bottom of the UV-cell at incubation times of 0, 10, 20, 30, 40, 50, 60, 70, 80, 90, 100, 110, and 120 min at 25°C ([DPPC] = 2.5 mM, **1**: 1.5%(w/v), [**3**] = 25  $\mu$ M, (A) [TMe- $\beta$ -CDx] = 7.5 mM, (B) [TMe- $\beta$ -CDx] = 0 mM).

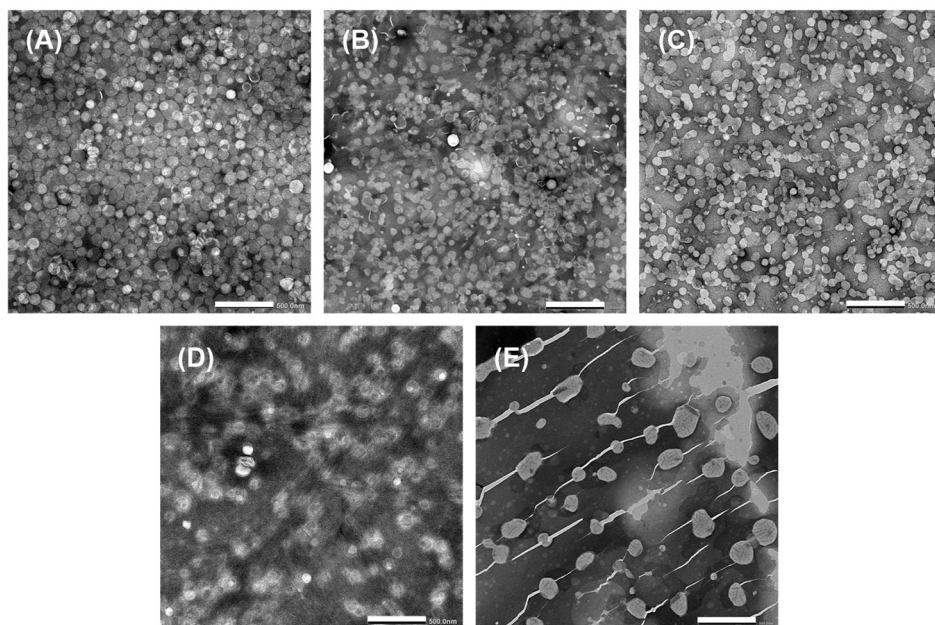

**Fig. S6** TEM images of the sol solution obtained from the liposome gel (600  $\mu$ L) after the addition of 15 mM aqueous solutions (600  $\mu$ L) of (A)  $\beta$ -CDx, (B) DMe- $\beta$ -CDx, (C) TMe- $\beta$ -CDx, and (D)  $\gamma$ -CDx and 150 mM aqueous solutions (600  $\mu$ L) of (E) DMe- $\beta$ -CDx and (F)  $\gamma$ -CDx. The scale bars correspond to 500 nm.



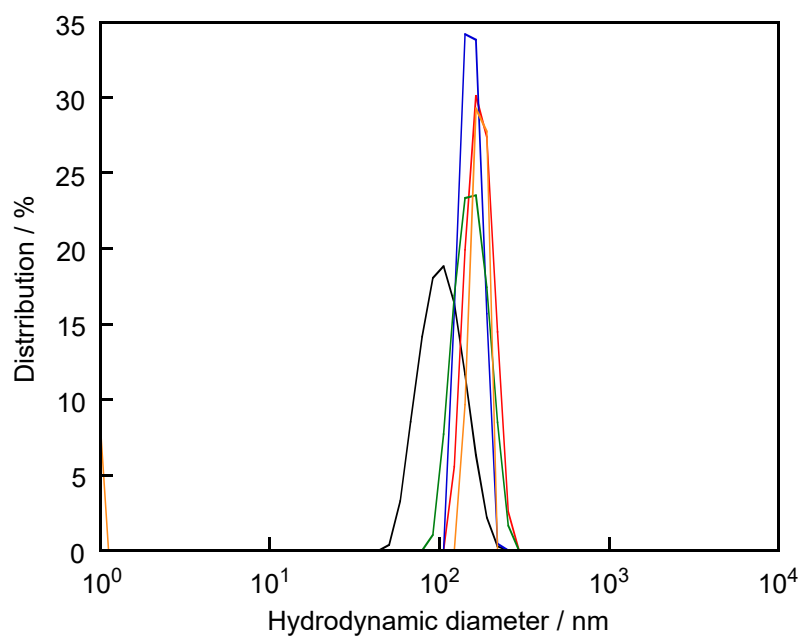

**Figure S7.** DLS size distribution profile for liposomes (black) and the sol solution obtained from the liposome gel (600  $\mu$ L) after the addition of 15 mM aqueous solutions (600  $\mu$ L) of  $\beta$ -CDx (red), DMe- $\beta$ -CDx (blue), TMe- $\beta$ -CDx (green), and  $\gamma$ -CDx (orange).

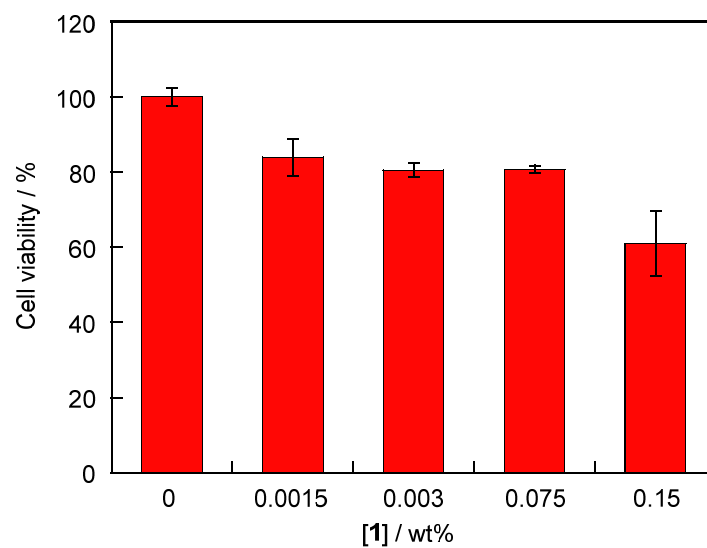

**Fig. S8** Viability of Colon26 cells treated with various concentrations of **1**. Cell viability was evaluated 24 h after treatment as described in the Experimental Section. Cell viability data were confirmed implementing the CCK-8 method. Error bars represent the values for the standard deviation for  $n = 3$ .
